# Supplementary material for: Role of lattice strain in bifunctional catalysts for tandem furfural hydrogenation–esterification
Source: Royal Society of Chemistry journal article supplement (doi:10.1039/d2cy01929a), 2022-12-20
Supplement: d2cy01929a1.pdf [file d2cy01929a1.pdf]

## Supporting Information

# Role of Lattice Strain in Bifunctional Catalyst for Tandem Furfural Hydrogenation-Esterification

**Luqman H. Hashim<sup>a</sup>, Ahmed Halilu<sup>b</sup>\*, Yahaya Balarabe Umar<sup>c</sup>, Mohd Rafie Bin  
Johan<sup>a,d,\*</sup>, Mohamed Kheireddine Aroua<sup>e,f,g</sup> Paramita Koley<sup>h</sup> Suresh K. Bhargava<sup>h,\*</sup>**

<sup>a</sup>Nanotechnology and Catalysis Research Centre (NANOCAT), University of Malaya, Kuala Lumpur - 50603, Malaysia

<sup>b</sup>Chemical Engineering, Faculty of Engineering, University of Malaya, Kuala Lumpur - 50603, Malaysia

<sup>c</sup>School of Chemical and Process Engineering, University of Leeds, LS2 9JT, Leeds, United Kingdom

<sup>d</sup>Advanced Materials Research Laboratory, Department of Mechanical Engineering, University of Malaya, Kuala Lumpur - 50603, Malaysia

<sup>e</sup>Centre for Carbon Dioxide Capture and Utilisation (CCDCU), School of Engineering and Technology, Sunway University, Bandar Sunway, 47500 Petaling Jaya, Malaysia

<sup>f</sup>Sunway Materials Smart Science and Engineering (SMS<sup>2</sup>E) Research Cluster, Sunway University, Bandar Sunway, 47500 Petaling Jaya, Malaysia

<sup>g</sup>Department of Engineering, Lancaster University, Lancaster, LA1 4YW, United Kingdom

<sup>h</sup>Centre for Advanced Materials and Industrial Chemistry (CAMIC), School of Science, RMIT University, Melbourne - 3001, Australia

### Correspondence:

\*Email: [mrafiej@um.edu.my](mailto:mrafiej@um.edu.my); +60193682407

\*Email: [suresh.bhargava@rmit.edu.au](mailto:suresh.bhargava@rmit.edu.au); +61-3-99253365

\*Email: [ahmed\\_h@um.edu.my](mailto:ahmed_h@um.edu.my); +601128328242

**Table S1: Chemicals**

| <b>Chemical</b>                                                                              | <b>Purity (%)</b> | <b>Company/Source</b>       |
|----------------------------------------------------------------------------------------------|-------------------|-----------------------------|
| Rice husk                                                                                    | 100               | Penang, Malaysia            |
| Sodium hydroxide, NaOH                                                                       | ≥97               | Merck Millipore             |
| Nitric acid, HNO <sub>3</sub>                                                                | 65 w/w            | Riendemann Schmidt Chemical |
| Copper (II) nitrate Penta hemihydrate, Cu (NO <sub>3</sub> ) <sub>2</sub> .5H <sub>2</sub> O | ≥99               | Riedel-de Haën              |
| Nickel (II) nitrate hexahydrate, Ni (NO <sub>3</sub> ) <sub>2</sub> .6H <sub>2</sub> O       | ≥99               | Sigma Aldrich               |
| Palladium (II) nitrate dehydrate, Pd (NO <sub>3</sub> ) <sub>2</sub> .2H <sub>2</sub> O      | ≥99               | Sigma Aldrich               |
| Aluminium Isopropoxide, AIP                                                                  | ≥98               | Sigma Aldrich               |
| Magnesium nitrate, Mg (NO <sub>3</sub> ) <sub>2</sub>                                        | ≥99               | Merck Millipore             |
| Furfural                                                                                     | ≥99               | Sigma Aldrich               |
| Acetic acid, glacial                                                                         | ≥99               | Sigma Aldrich               |
| Ethanol                                                                                      | ≥99.8             | Sigma Aldrich               |
| Pyridine, anhydrous                                                                          | ≥99.8             | Sigma Aldrich               |

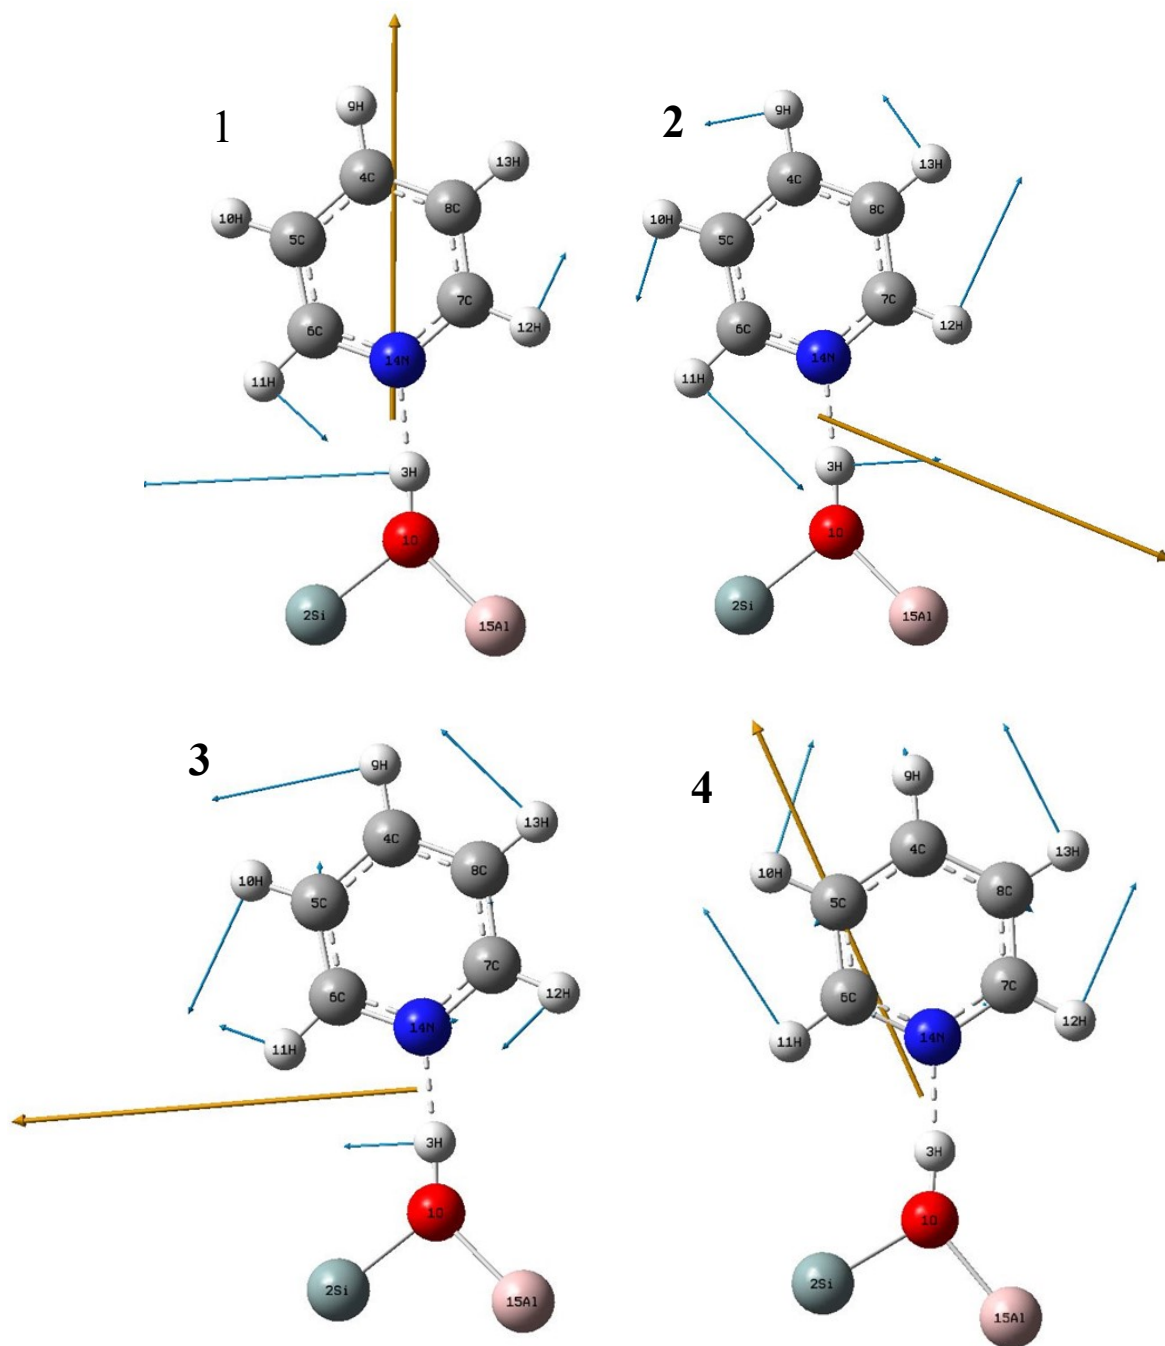

**Fig. S1:** The dipole moment and dipole derivative of pyridine adsorbed on Brønsted acid sites for single metal-doped ( $M = \text{Cu}, \text{Ni}, \text{ and } \text{Pd}$ )/ $\text{RHSiO}_2\text{-Al-Mg}$ .

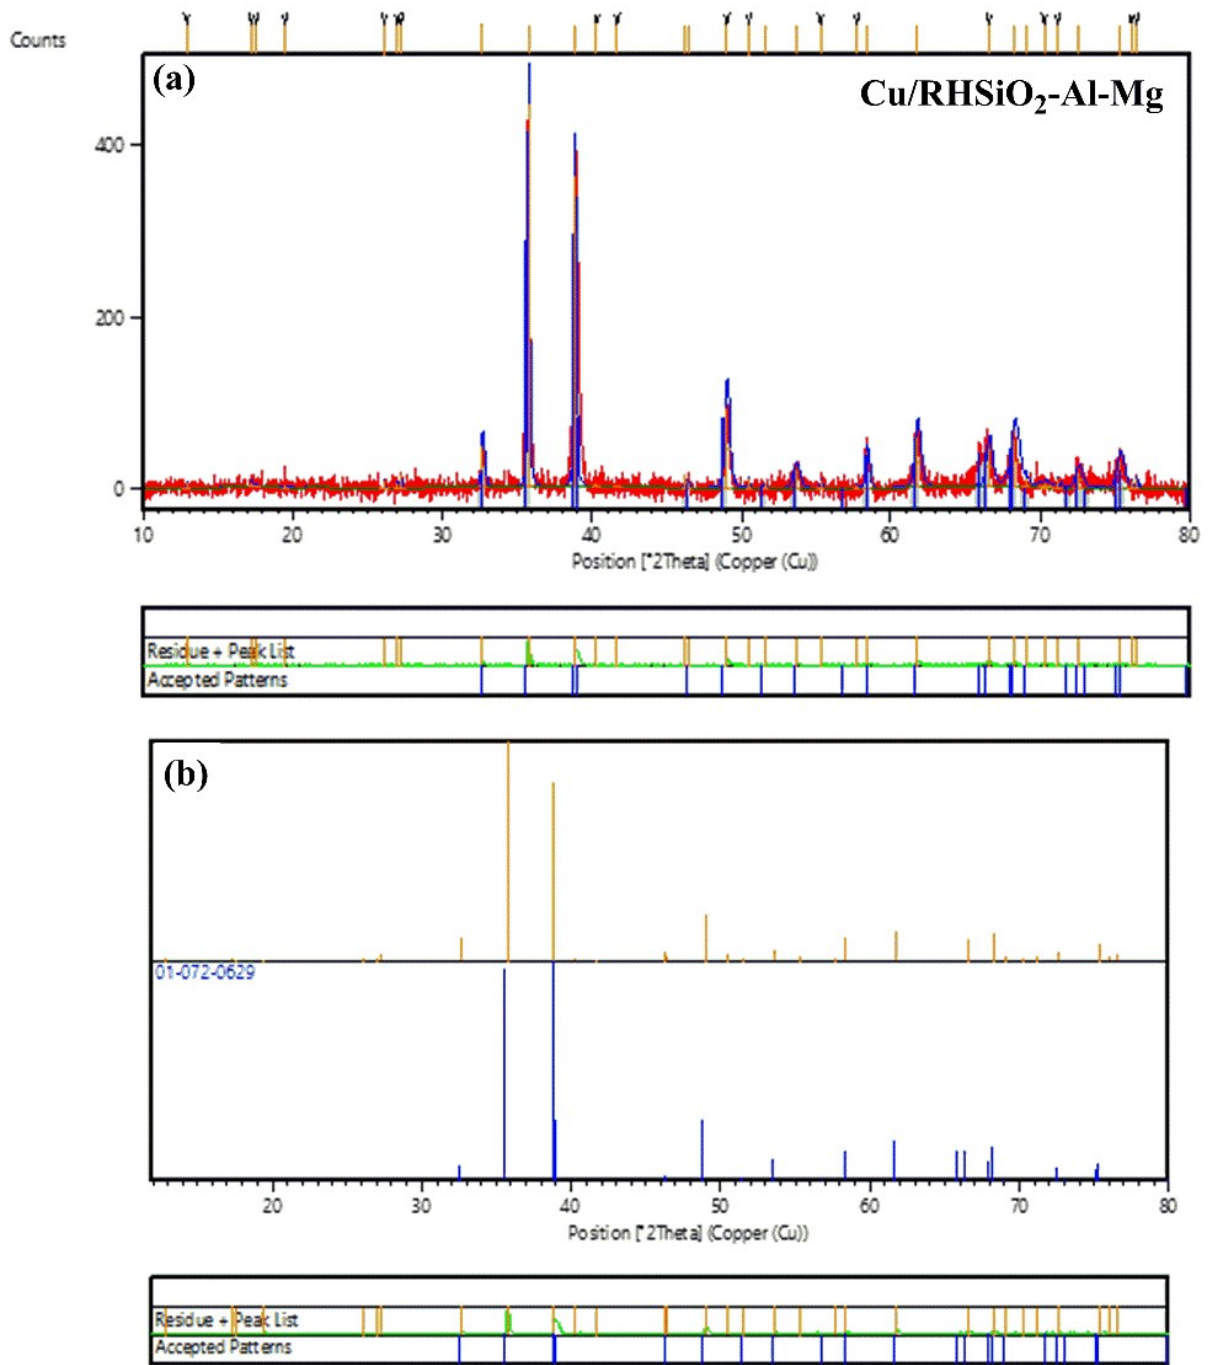

**Fig. S2:** (a) Peak lists of Cu/RHSiO<sub>2</sub>-Al-Mg (b) Experimental-library matches of Cu/RHSiO<sub>2</sub>-Al-Mg

**Table S2:** Crystal parameters of Cu/RHSiO<sub>2</sub>-Al-Mg

|                                                       |                    |
|-------------------------------------------------------|--------------------|
| <b>Reference Code</b>                                 | <b>01-072-0629</b> |
| <b>Compound Name</b>                                  | Copper oxide       |
| <b>Crystal System</b>                                 | Monoclinic         |
| <b>Space Group</b>                                    | C2/c               |
| <b>Space Group Number</b>                             | 15                 |
| <b>A (Å)</b>                                          | 4.6837             |
| <b>B (Å)</b>                                          | 3.4226             |
| <b>C (Å)</b>                                          | 5.1288             |
| <b>Alpha (°)</b>                                      | 90.0000            |
| <b>Beta (°)</b>                                       | 99.5400            |
| <b>Gamma (°)</b>                                      | 90.0000            |
| <b>Calculated Density (g/cm<sup>3</sup>)</b>          | 6.51               |
| <b>Volume Of Cell (10<sup>6</sup> pm<sup>3</sup>)</b> | 81.08              |
| <b>Z</b>                                              | 4.00               |
| <b>R<sub>int</sub></b>                                | 3.90               |

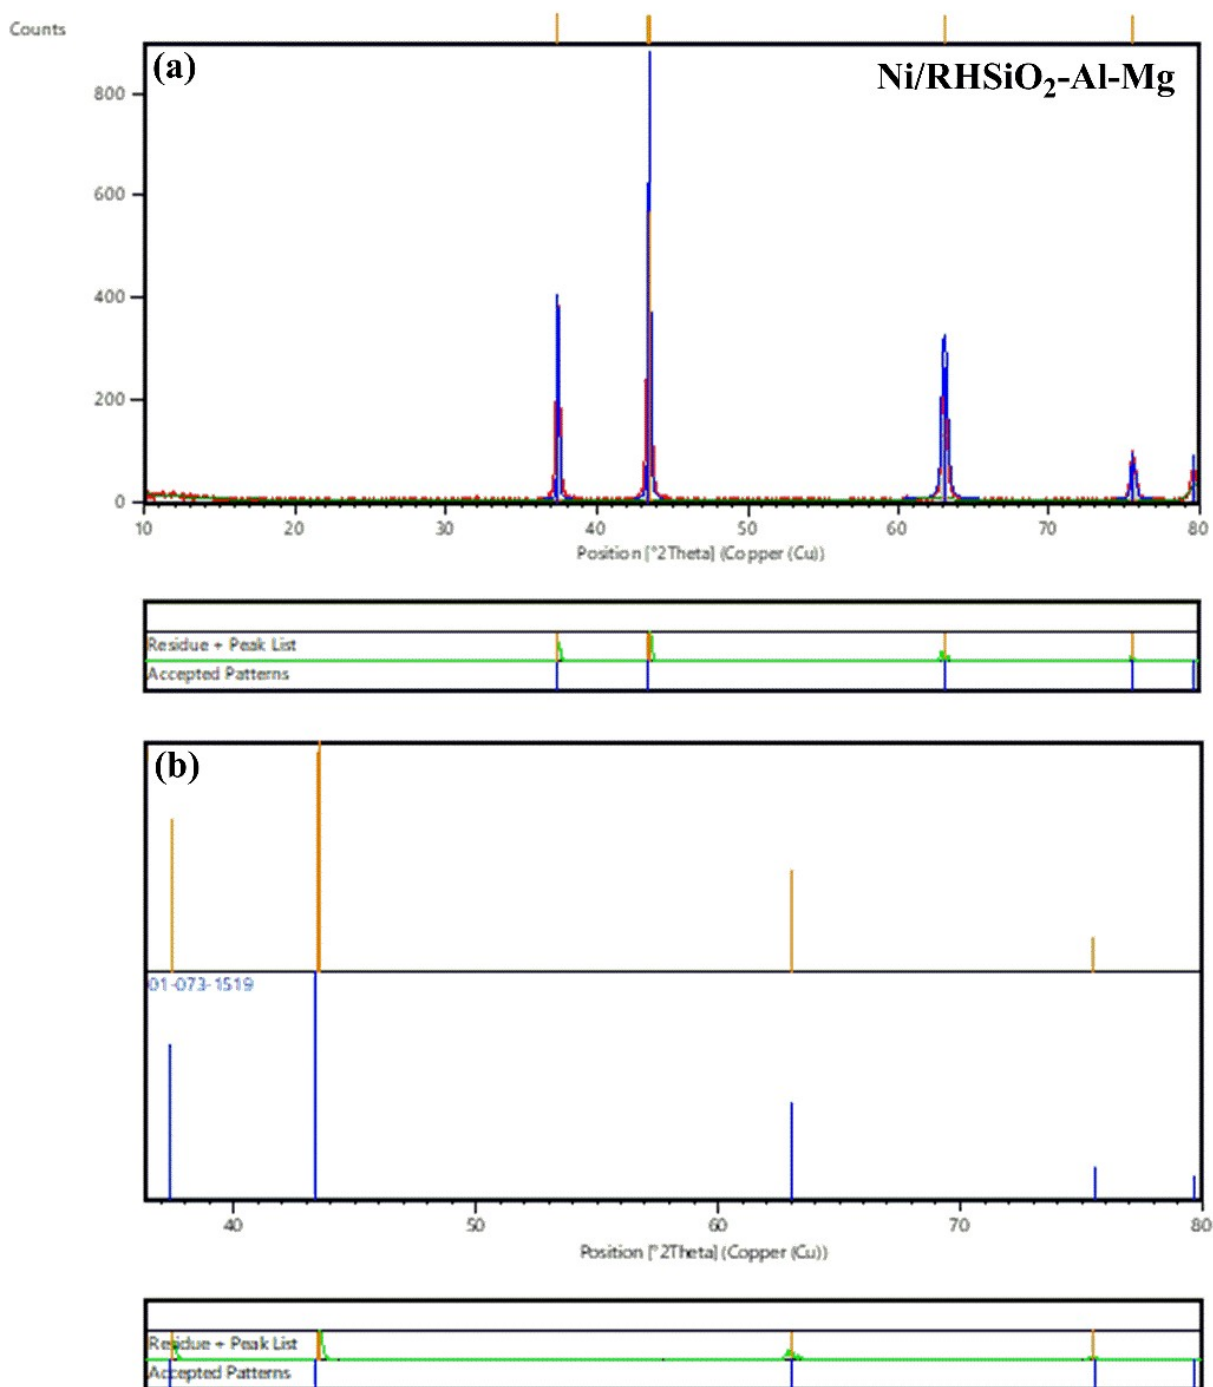

**Fig. S3:** (a) Peak lists of Ni/RHSiO<sub>2</sub>-Al-Mg (b) Experimental-library matches of Ni/RHSiO<sub>2</sub>-Al-Mg

**Table S3:** Crystal parameters of Ni/RHSiO<sub>2</sub>-Al-Mg

|                                                       |                    |
|-------------------------------------------------------|--------------------|
| <b>Reference code</b>                                 | <b>01-073-1519</b> |
| <b>Compound name</b>                                  | Nickel oxide       |
| <b>Crystal system</b>                                 | Cubic              |
| <b>Space group</b>                                    | Fm-3m              |
| <b>Space group number</b>                             | 225                |
| <b>A (Å)</b>                                          | 4.1684             |
| <b>B (Å)</b>                                          | 4.1684             |
| <b>C (Å)</b>                                          | 4.1684             |
| <b>Alpha (°)</b>                                      | 90.0000            |
| <b>Beta (°)</b>                                       | 90.0000            |
| <b>Gamma (°)</b>                                      | 90.0000            |
| <b>Calculated density (g/cm<sup>3</sup>)</b>          | 6.85               |
| <b>Volume of cell (10<sup>6</sup> pm<sup>3</sup>)</b> | 72.43              |
| <b>Z</b>                                              | 4.00               |
| <b>R<sub>int</sub></b>                                | 4.74               |

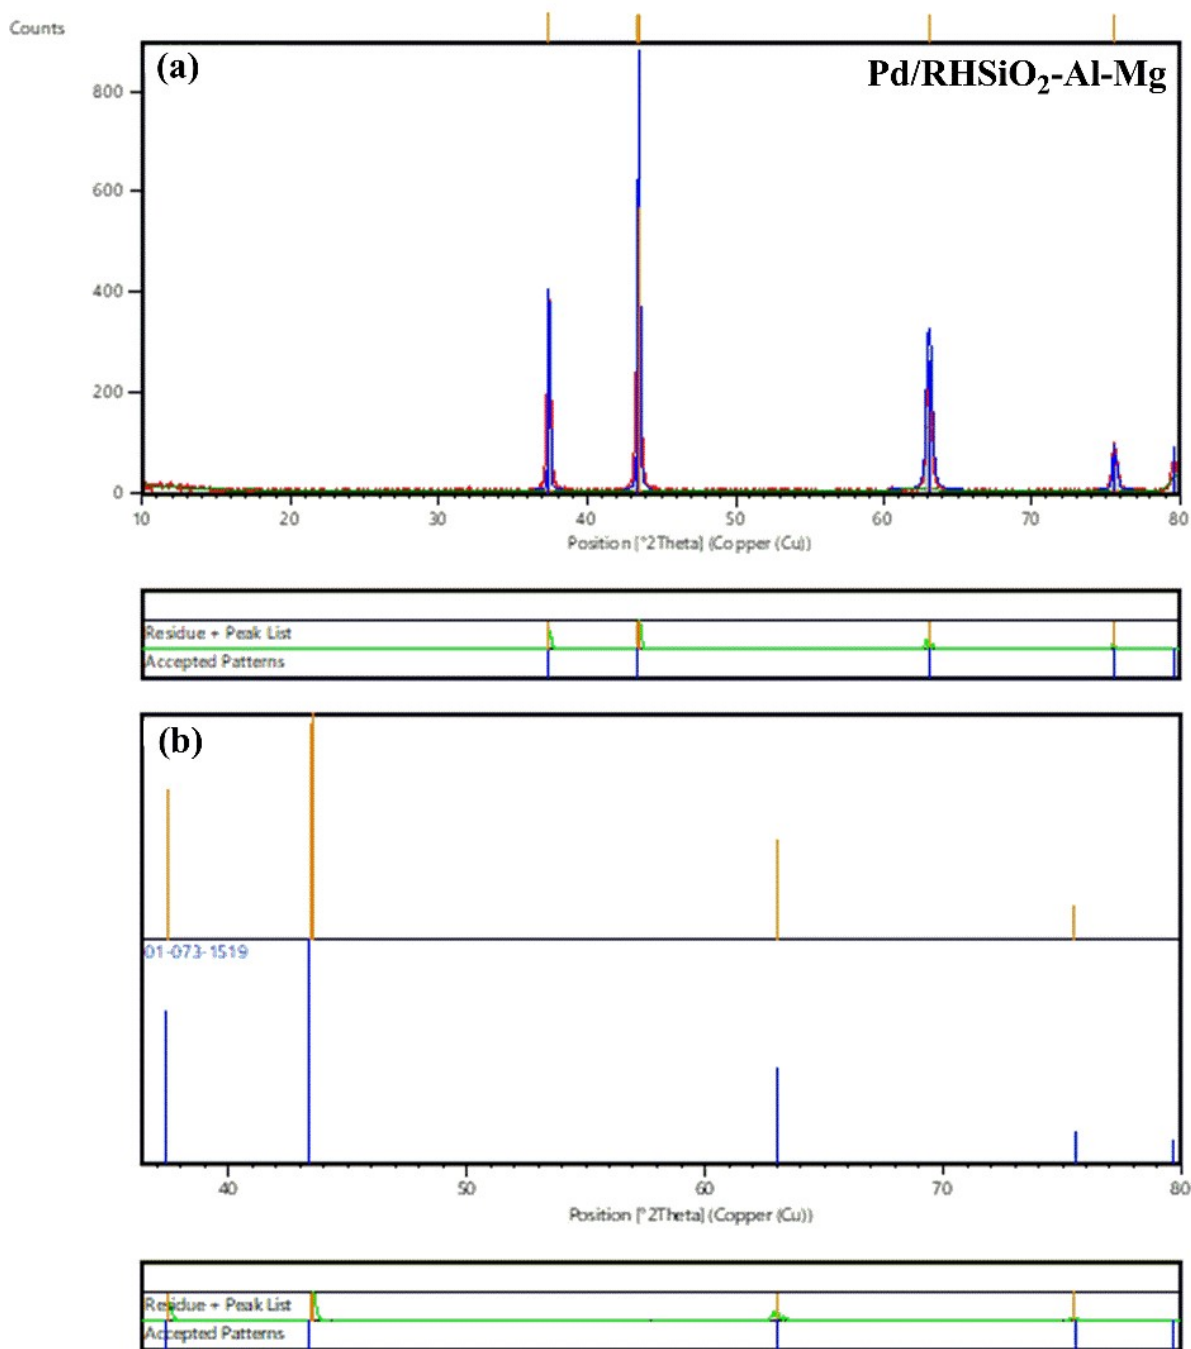

**Fig. S4:** (a) Peak lists of Pd/RHSiO<sub>2</sub>-Al-Mg (b) Experimental-library matches of Pd/RHSiO<sub>2</sub>-Al-Mg



**Table S4:**  
parameters of  
Mg

Crystal  
Pd/RHSiO<sub>2</sub>-Al-

|                                                       |                    |
|-------------------------------------------------------|--------------------|
| <b>Reference code</b>                                 | <b>01-075-0584</b> |
| <b>Compound name</b>                                  | Palladium Oxide    |
| <b>Crystal system</b>                                 | Tetragonal         |
| <b>Space group</b>                                    | P-4n2              |
| <b>Space group number</b>                             | 118                |
| <b>A (Å)</b>                                          | 3.0360             |
| <b>B (Å)</b>                                          | 3.0360             |
| <b>C (Å)</b>                                          | 5.3270             |
| <b>Alpha (°)</b>                                      | 90.0000            |
| <b>Beta (°)</b>                                       | 90.0000            |
| <b>Gamma (°)</b>                                      | 90.0000            |
| <b>Calculated density (g/cm<sup>3</sup>)</b>          | 8.28               |
| <b>Volume of cell (10<sup>6</sup> pm<sup>3</sup>)</b> | 49.10              |
| <b>Z</b>                                              | 2.00               |
| <b>Rir</b>                                            | 14.48              |

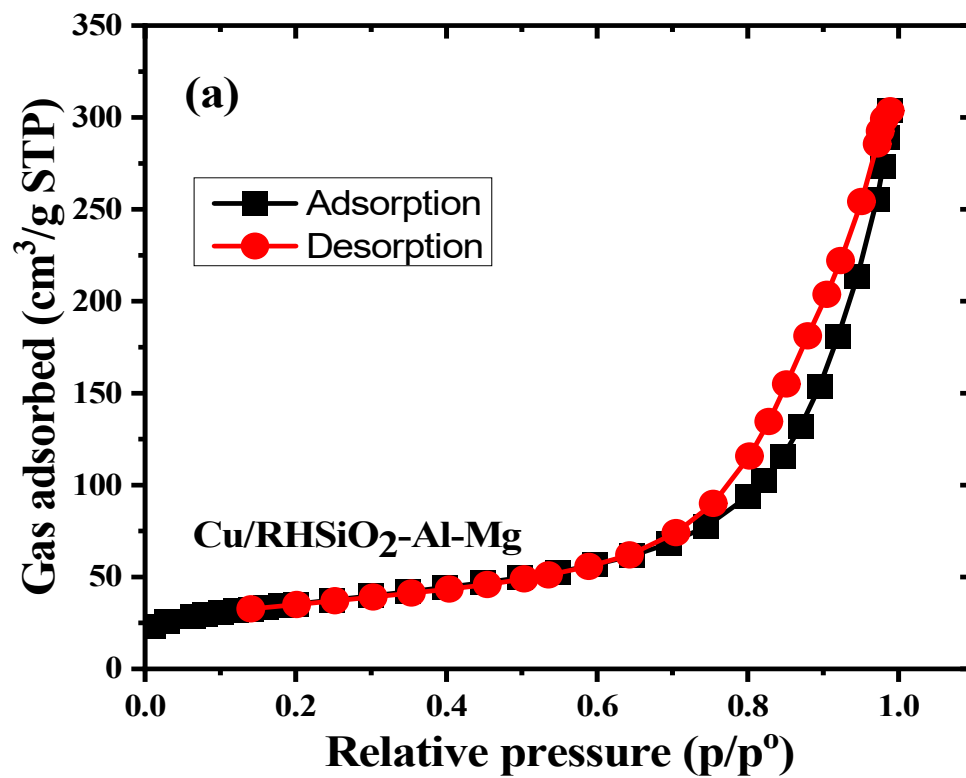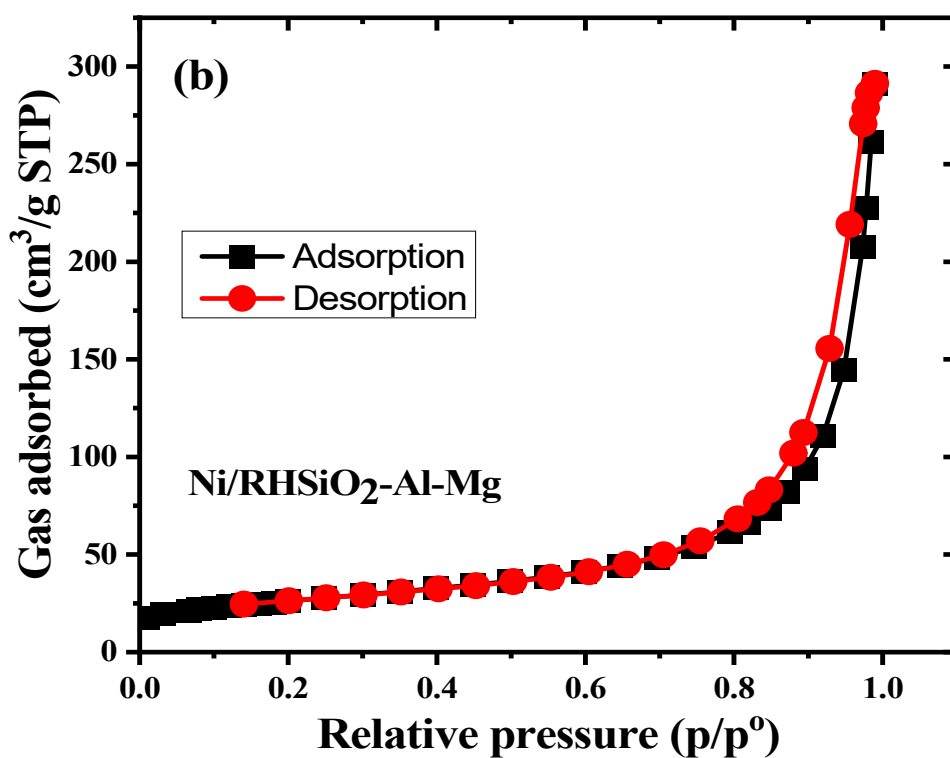

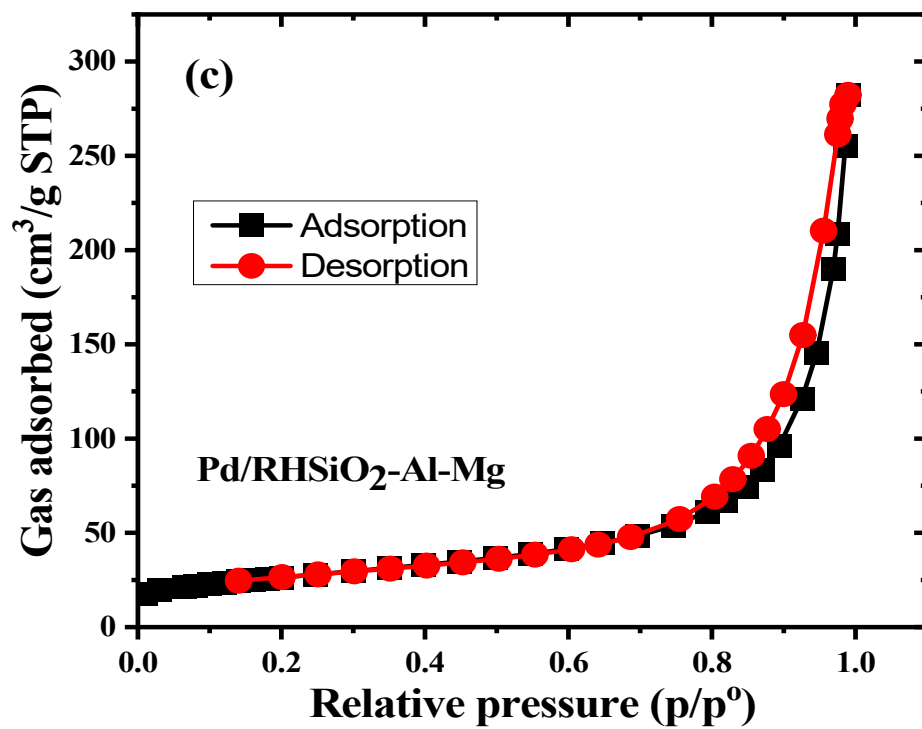

Fig. S5: BET hysteresis loop

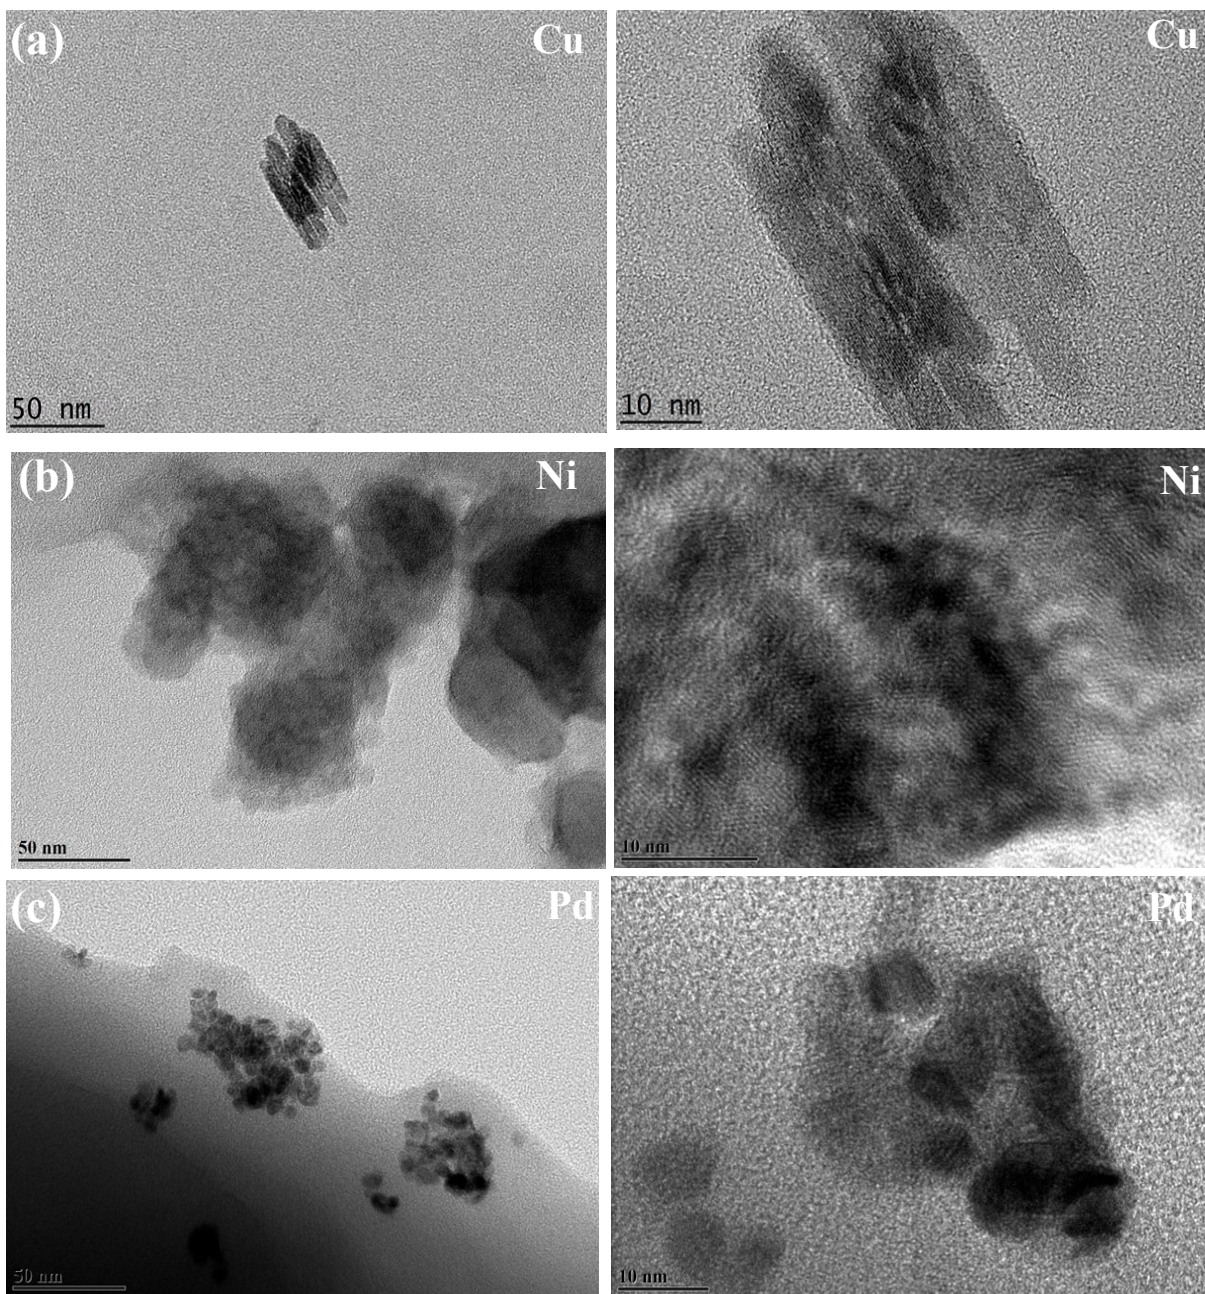

**Fig. S6:** Reused catalysts HR-TEM
